# Supplementary material for: Tunable Non-Enzymatic Glucose Electrochemical Sensing Based on the Ni/Co Bimetallic MOFs
Source: MDPI journal article supplement (doi:10.3390/molecules28155649), 2023-07-26
Supplement: s1 [file molecules-2507200-supplementary.pdf › molecules-2507200-supplementary.pdf]

# Tunable non-enzymatic glucose electrochemical sensing based on the Ni/Co bimetallic MOFs

Qi Wang <sup>1,2</sup>, Qi Jia <sup>1,2</sup>, Peng Hu <sup>2,\*</sup> and Liudi Ji <sup>2,\*</sup>

<sup>1</sup> School of Pharmacy, Hubei University of Science and Technology, Xianning 437100, China

<sup>2</sup> Hubei Key Laboratory of Radiation Chemistry and Functional Materials, Hubei University of Science and Technology, Xianning 437100, China

\* Correspondence: jiliudi@126.com (L.J.); hupeng@hbust.edu.cn (P. Hu).

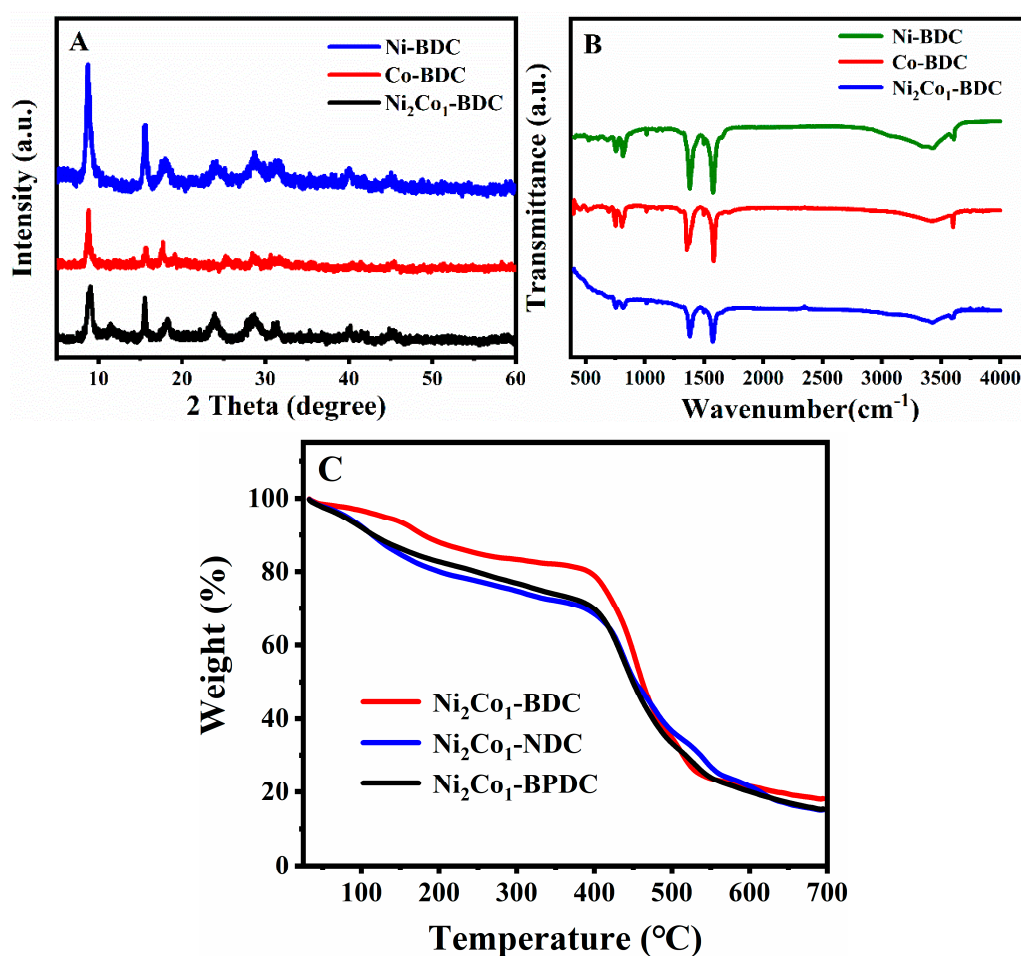

Figure S1. (A) XRD and (B) FTIR spectra of monometallic and bimetallic MOF; (C) Thermal gravimetric analysis (TGA) curve of Ni<sub>2</sub>Co<sub>1</sub>-L MOFs.

**Table S1.** The element content of Ni<sub>2</sub>Co<sub>1</sub>-BDC.

| Element | Weight % | Atomic % | Error % |
|---------|----------|----------|---------|
| C K     | 33.88    | 53.17    | 8.65    |
| O K     | 29.88    | 35.21    | 9.03    |
| CoK     | 12.38    | 3.96     | 8.76    |
| NiK     | 23.86    | 7.66     | 6.41    |

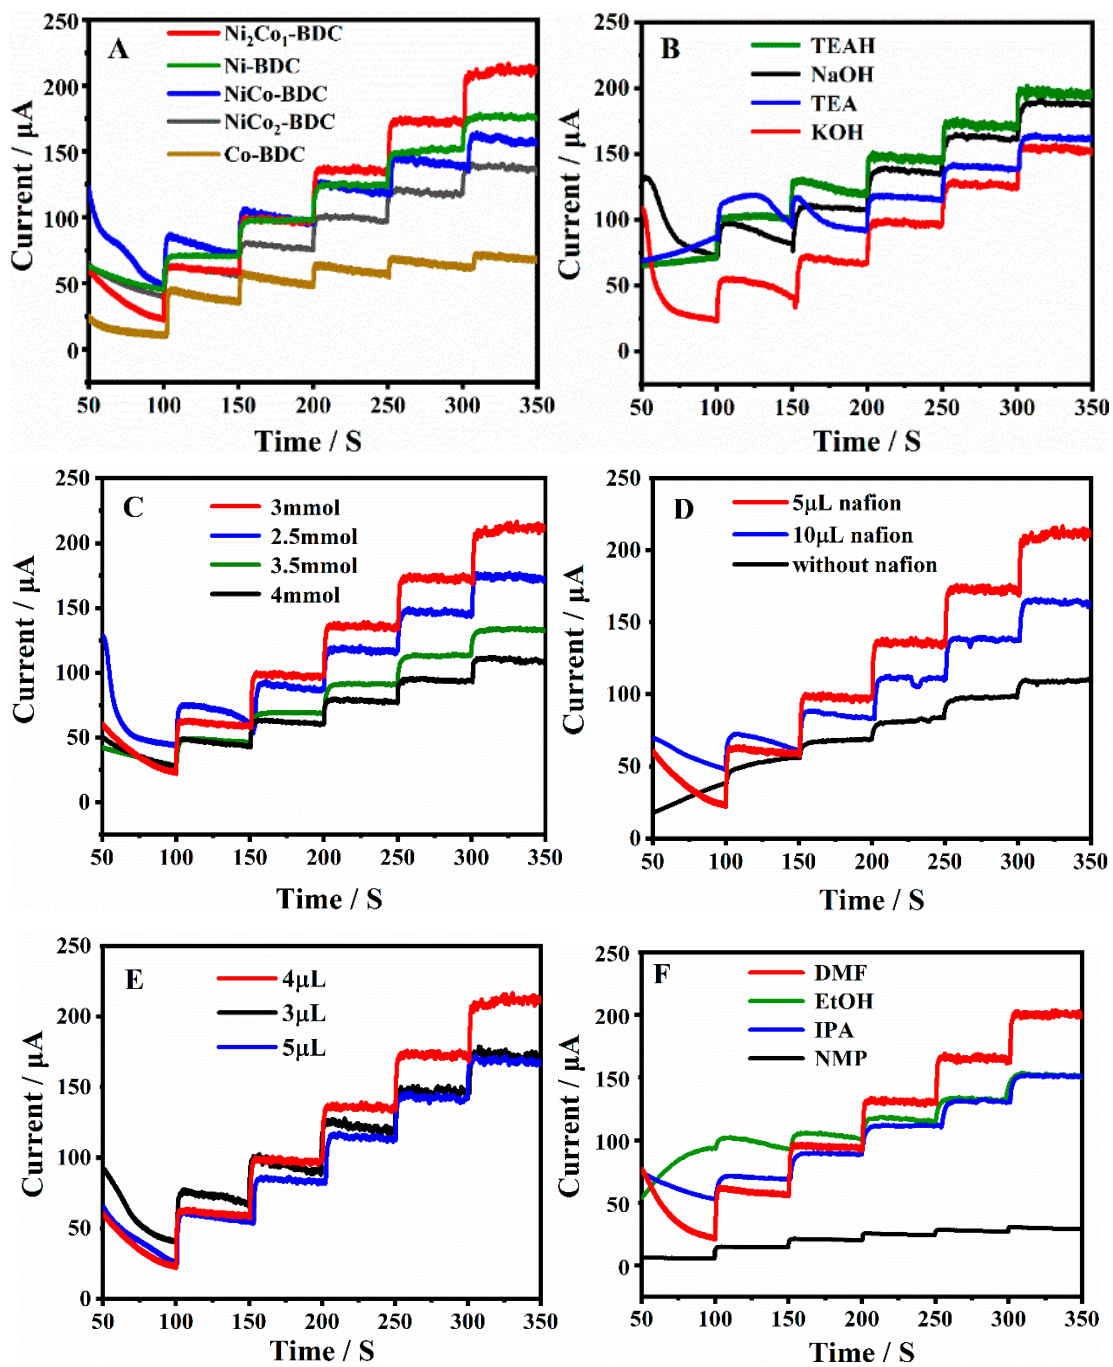

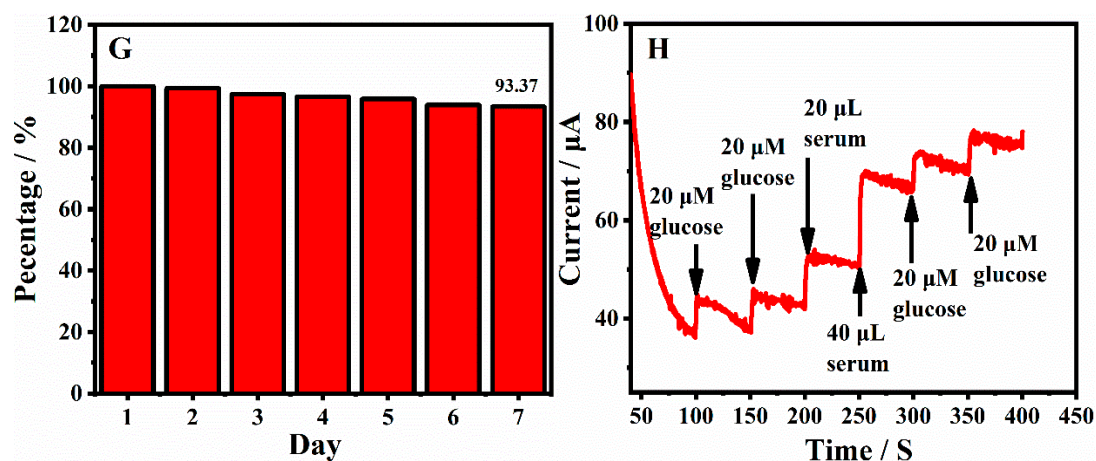

**Figure S2.** i-t curves of MOFs under different experimental conditions with the continuous injection of 0.1 mM glucose. (A) metal center and scale; (B) types of alkali; (C) amounts of KOH; (D) the volume of Nafion; (E) modified volume; (F) dispersing solvents; (G) stability of Ni<sub>2</sub>Co<sub>1</sub>-BDC/GCE in 0.1 M NaOH solution containing 0.1 mM Glu; (H) Amperometric response of Ni<sub>2</sub>Co<sub>1</sub>-BDC/GCE at successive additions of 20  $\mu$ M glucose, 20  $\mu$ L serum and 40  $\mu$ L serum, followed by 20  $\mu$ M glucose.
